# Supplementary material
Source: Springer Nature journal article supplement (http://www.springermedizin.de/resource/supplementary/12891_2007_353_MOESM7_ESM.pdf/9511122)

# Survival of the Nottingham Total Shoulder Replacement Prosthesis in Patients with RA (1994-1997)

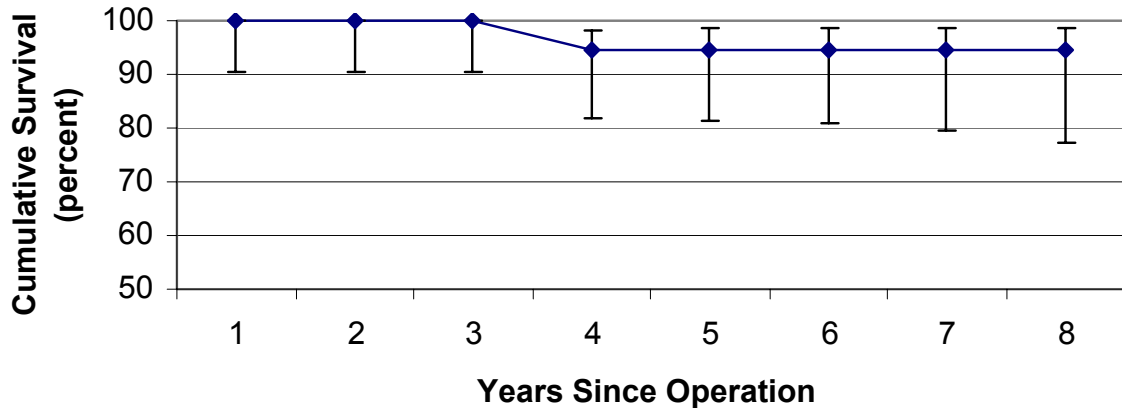

Supplement: MOESM7 [file 9511122]
